# Supplementary material
Source: Springer Nature journal article supplement (https://www.springermedizin.de/resource/supplementary/13584_2013_79_MOESM4_ESM.pdf/9676936)

## Schizophrenia

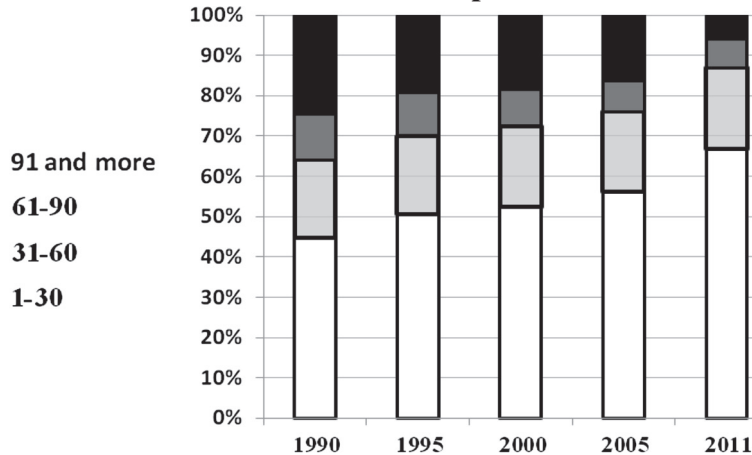

## Affective disorders

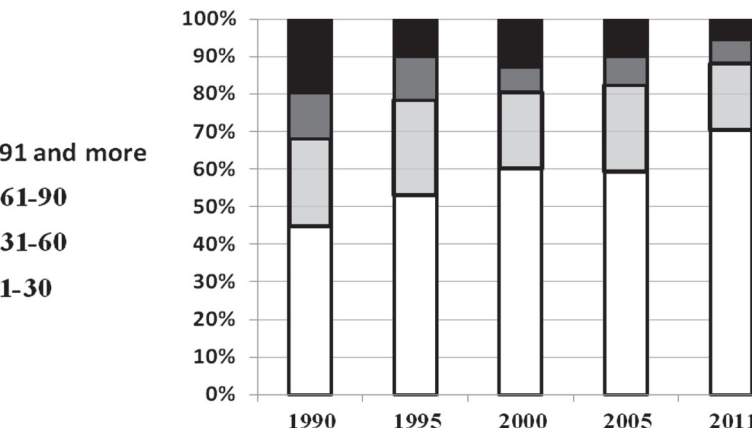

Supplement: MOESM4 [file 9676936]
